# Supplementary material for: Docking interactions of the JNK scaffold protein WDR62
Source: PubMed Central journal article supplement — Biochem J. 2011 Oct 13;439(Pt 3):381–90. doi: 10.1042/BJ20110284 (PMC3462610; doi:10.1042/bj20110284), 2011-10-13
Supplement: bj4390381add.pdf [file bj4390381add.pdf]

SUPPLEMENTARY ONLINE DATA

Docking interactions of the JNK scaffold protein WDR62

Ksenya COHEN-KATSENELSON\*<sup>1</sup>, Tanya WASSERMAN\*<sup>1</sup>, Samer KHATEB\*, Alan J. WHITMARSH† and Ami ARONHEIM\*<sup>2</sup>

\*Department of Molecular Genetics, The Rappaport Family Institute for Research in the Medical Sciences, Technion – Israel Institute of Technology, 1 Efron Street, Bat-Galim, Haifa 31096, Israel, and †Faculty of Life Sciences, University of Manchester, Michael Smith Building, Oxford Road, Manchester M13 9PT, U.K.

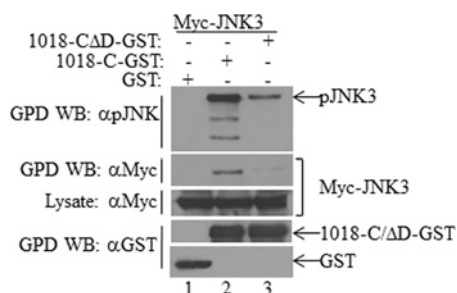

Figure S1 A putative D domain within WDR62 is responsible for WDR62–JNK3 association

HEK-293T cells were transfected with plasmids encoding GST, 1018-C–GST or 1018-CΔD–GST together with HA–JNK3 as indicated. GST-containing complexes were isolated from cell lysates as indicated. GST-containing complexes were isolated from cell lysates using glutathione–agarose beads, washed extensively and eluted with reduced glutathione. The protein complexes were subjected to Western blotting (WB) with anti-pJNK (top panel), anti-Myc (second and third panels from top) or anti-GST (bottom two panels) antibodies. The expression level of Myc–JNK3 was determined by blotting the total cell lysate with anti-Myc antibody (third panel from top). The migration of the relevant proteins is indicated by arrows.

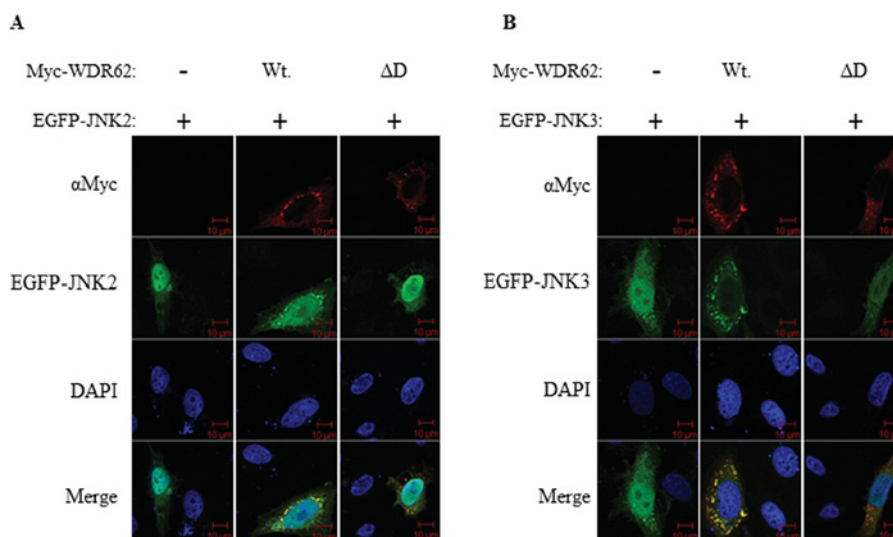

Figure S2 WDR62 recruits JNK2 and JNK3 to cellular granules through its putative consensus D domain

HeLa cells were co-transfected with EGFP–JNK2 (A) or EGFP–JNK3 (B) expression plasmids together with plasmids encoding either wild-type WDR62 (Wt.) or the D domain deletion mutant (ΔD). Cells were fixed and stained with anti-Myc antibody (red). EGFP–JNK2/3 is shown in green. Co-localization appears in yellow in the merged image. Nuclei were stained with DAPI (blue). Representative confocal microscopy images are shown. Scale bar, 10 μm.

<sup>1</sup> These authors contributed equally to this work.

<sup>2</sup> To whom correspondence should be addressed (email aronheim@tx.technion.ac.il).

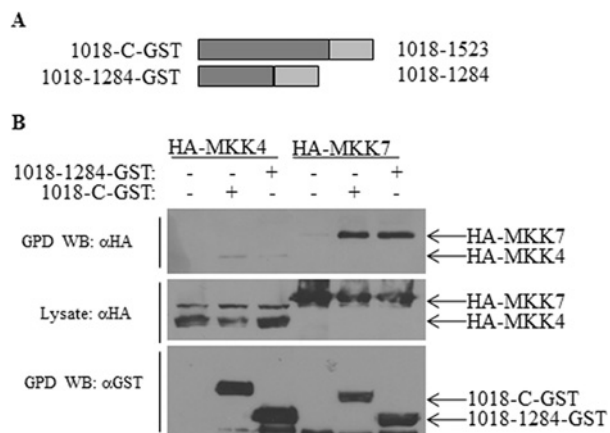

**Figure S3 Both MKK7 and MKK4 associate with WDR62**

HEK-293T cells were transfected with a plasmid encoding 1018-C-GST or 1018-1284-C-GST together with HA-MKK7 or HA-MKK4 as indicated. An empty GST plasmid was used as a negative control. GST-containing complexes were isolated from cell lysates using glutathione-agarose beads, washed extensively and eluted with reduced glutathione. The protein complexes were subjected to Western blotting (WB) with either anti-HA or anti-GST antibody (top and bottom panels respectively). The expression level of HA-MKK was determined by blotting the total cell lysate with anti-HA antibody (middle panel). The migration of the relevant proteins is indicated by arrows.

Received 14 February 2011/21 June 2011; accepted 13 July 2011  
Published as BJ Immediate Publication 13 July 2011, doi:10.1042/BJ20110284
